# Supplementary material for: Mussel-inspired chemistry for one-step synthesis of N-doped carbon–gold composites with morphology tailoring and their catalytic properties
Source: Royal Society of Chemistry journal article supplement (doi:10.1039/c3ra45566a), 2013-12-03
Supplement: c3ra45566a.pdf [file c3ra45566a.pdf]

## Supplementary Information

### Mussel-inspired chemistry for one-step synthesis of N-doped carbon-gold composites with morphology tailoring and their catalytic properties

Zhiyuan Ma,<sup>a</sup> Xin Jia,<sup>a\*</sup> Jiamei Hu,<sup>a</sup> Feng zhou<sup>b</sup> and Bin Dai<sup>a</sup>

<sup>a</sup> School of Chemistry and Chemical Engineering/Key Laboratory for Green Processing of Chemical Engineering of Xinjiang bingtuan, Key Laboratory for Chemical Materials of Xinjiang Uygur Autonomous Region, Shihezi University, Shihezi 832003, P. R. China.

<sup>b</sup> State Key Laboratory of Solid Lubrication, Lanzhou Institute of Chemical Physics, Chinese Academy of Sciences, Lanzhou 730000, P. R. China.

**Table S1** Properties and synthesis parameters of P-AuNPs

**Fig. S1.** (A) Photographs of dry composites and that of the composites dispersed in water. (B) The XRD pattern of as-prepared NC-AuNPs, P-AuNPs and Polydopamine.

**Fig. S2.** EDX spectrum of the surface of prepared catalysts.

**Fig. S3.** The UV-vis absorbance spectra of the NC-AuNPs-0.3(A) and NC-AuNPs-0.3-ice (B) catalyzed reduction of 4-nitrophenol at different times. Table S1 Properties and synthesis parameters of P-AuNPs

**Table S1** Properties and synthesis parameters of P-AuNPs

| Sample          | H AuCl<br>4<br>(mL) | Dopamine<br>mg/mL | Water<br>(mL) | Isopropanol<br>(mL) | Temperature<br>(°C) | AuNPs size<br>(nm) |
|-----------------|---------------------|-------------------|---------------|---------------------|---------------------|--------------------|
| P-AuNPs-1.5     | 0.25                | 1.5               | 15            | 0                   | RT                  | -                  |
| P-AuNPs-1.0     | 0.25                | 1                 | 15            | 0                   | RT                  | -                  |
| P-AuNPs-0.5     | 0.25                | 0.5               | 15            | 0                   | RT                  | 15                 |
| P-AuNPs-0.3     | 0.25                | 0.3               | 15            | 0                   | RT                  | 8                  |
| P-AuNPs-1.5-ipa | 0.25                | 1.5               | 10            | 5                   | RT                  | -                  |
| P-AuNPs-1.5-ice | 0.25                | 1.5               | 10            | 5                   | 0°C                 | -                  |
| P-AuNPs-0.3-ice | 0.25                | 0.3               | 10            | 5                   | 0°C                 | 5                  |

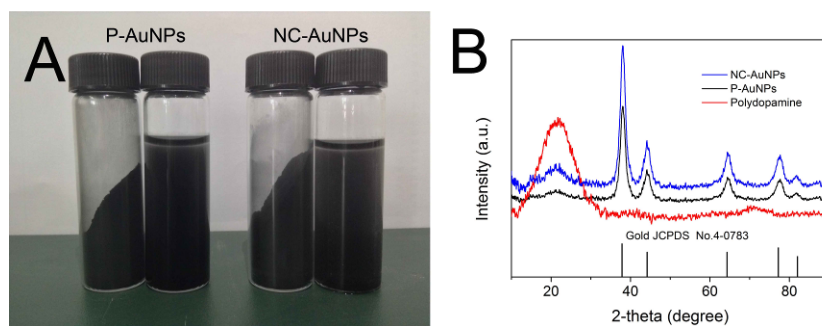

**Fig. S1.** (A) Photographs of dry composites and that of the composites dispersed in water. (B) The XRD pattern of as-prepared NC-AuNPs, P-AuNPs and Polydopamine.

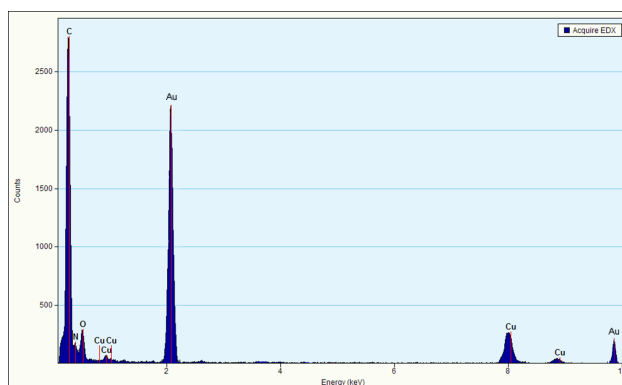

**Fig. S2.** EDX spectrum of the surface of prepared catalysts.

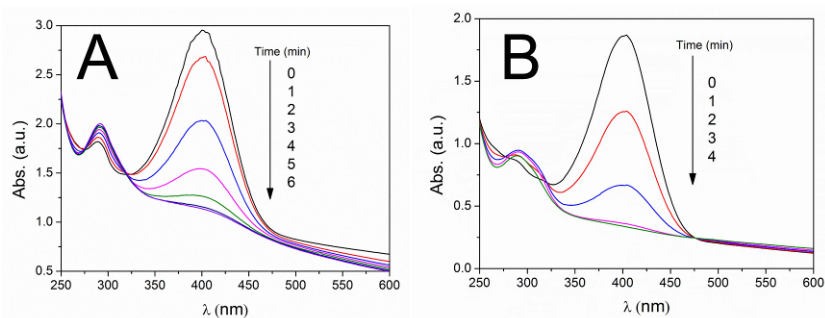

**Fig. S3.** The UV-vis absorbance spectra of the NC-AuNPs-0.3(A) and NC-AuNPs-0.3-ice (B) catalyzed reduction of 4-nitrophenol at different times.

---
